# Supplementary material for: Ni-Doped SnO2 as an Electron Transport Layer by a Low-Temperature Process in Planar Perovskite Solar Cells
Source: PubMed Central journal article supplement — ACS Omega. 2022 Jun 17;7(26):22256–62. doi: 10.1021/acsomega.2c00965 (PMC9260750; doi:10.1021/acsomega.2c00965), 2022-06-17
Supplement: ao2c00965_si_001.pdf [file ao2c00965_si_001.pdf]

Supporting information

# Ni-doped SnO<sub>2</sub> as electron transport layer by a low-temperature process in planar perovskite solar cells

*Hoang V. Quy<sup>a,b</sup>, Chung W. Bark<sup>b,\*</sup>*

<sup>a</sup>Division of Energy Technology, Daegu-Gyeongbuk Institute of Science and Technology

(DGIST), Daegu 42988, Korea;

<sup>b</sup>Department of Electrical Engineering, Gachon University, Seongnam 13120, Korea;

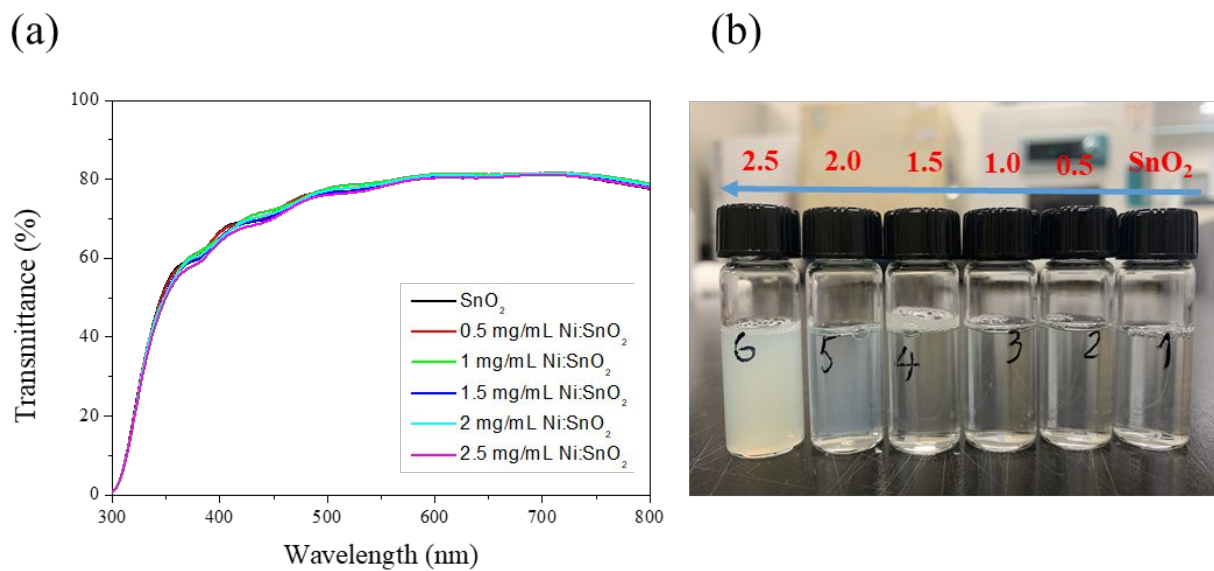

**Figure S1.** (a) Transmission spectra of 0, 0.5, 1, 1.5, 2, and 2.5 mg mL<sup>-1</sup> SnO<sub>2</sub> films coated on FTO substrates. (b) Digital images of SnO<sub>2</sub> and different concentration of Ni-SnO<sub>2</sub> nanoparticle solutions.

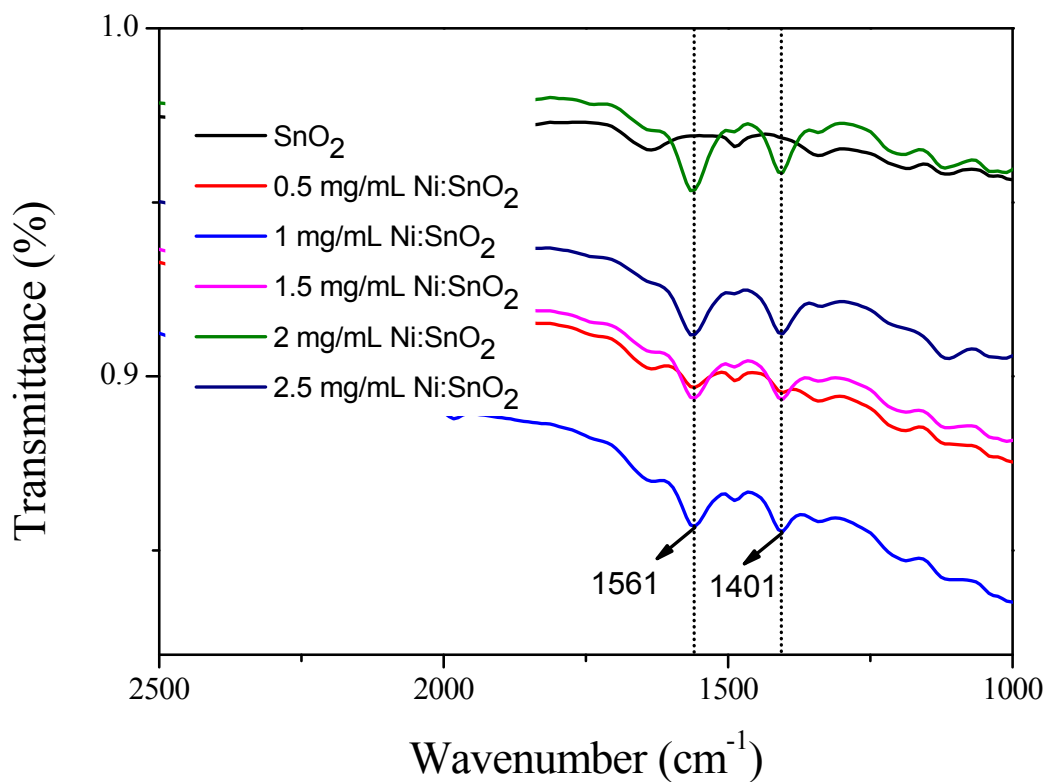

**Figure S2.** FTIR analysis of SnO<sub>2</sub> and Ni-doped SnO<sub>2</sub> layers at different concentrations.

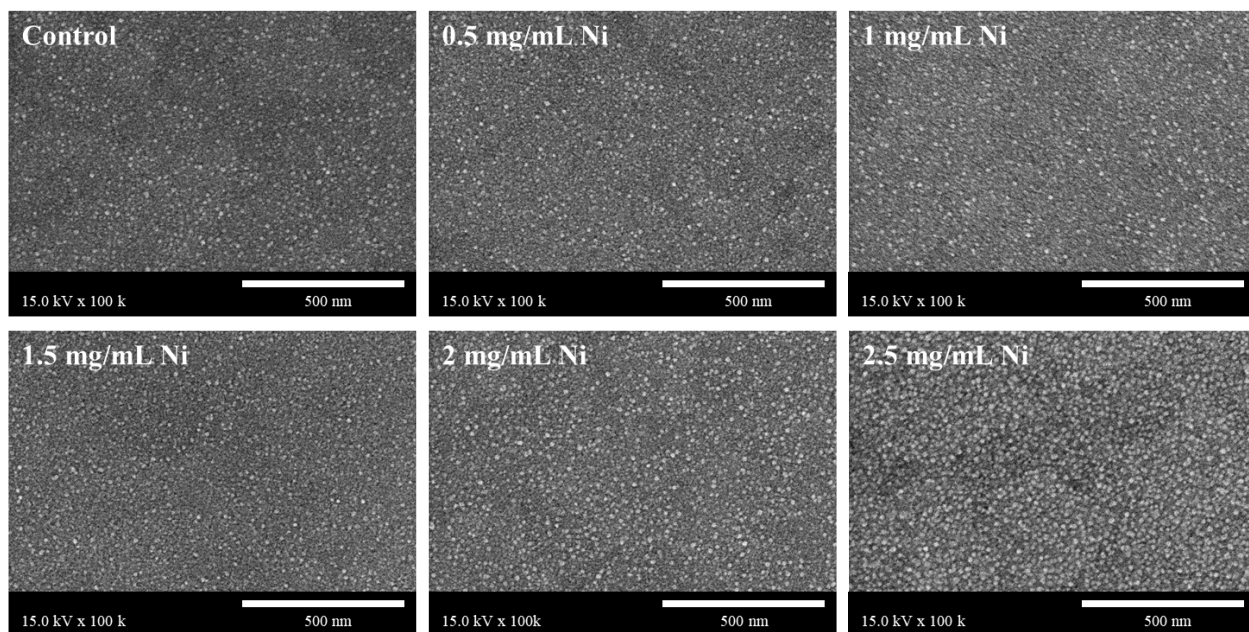

**Figure S3.** SEM images of SnO<sub>2</sub> and Ni:SnO<sub>2</sub> under different concentrations of Ni<sup>+</sup> doping levels.

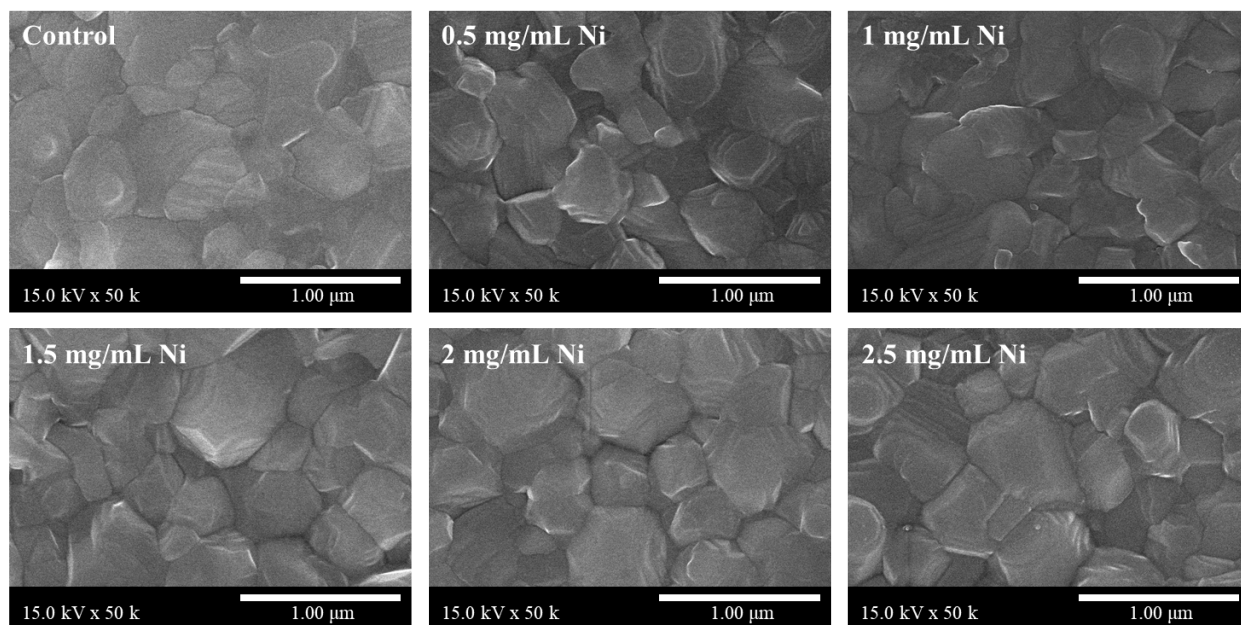

**Figure S4.** SEM images of perovskite films coated on Ni:SnO<sub>2</sub> films at different concentrations.

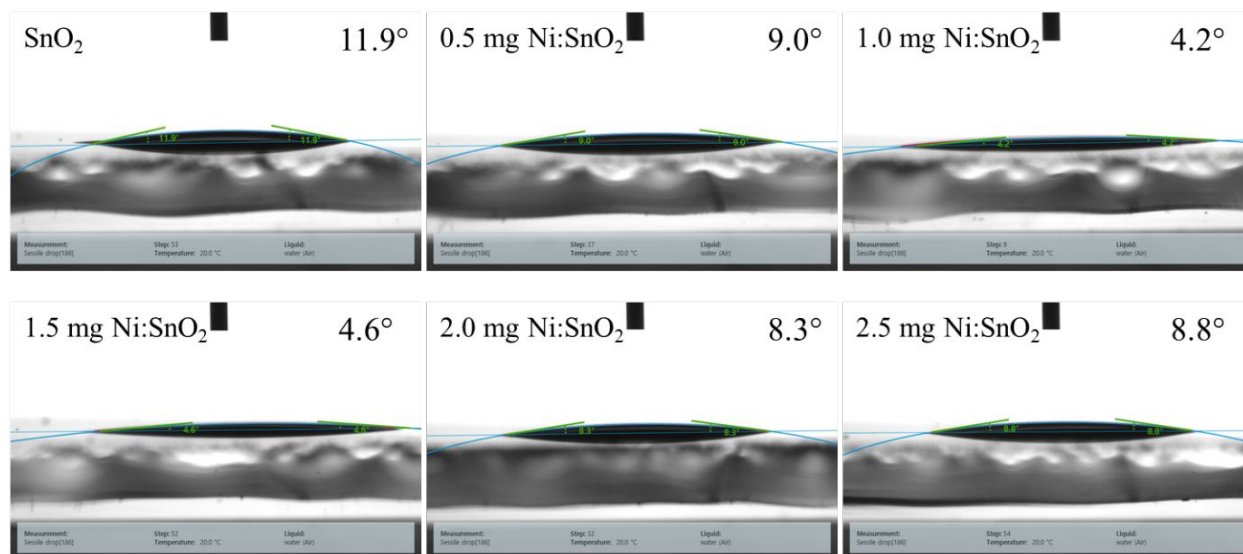

**Figure S5.** Contact angles of SnO<sub>2</sub> and Ni:SnO<sub>2</sub> films under different concentrations.

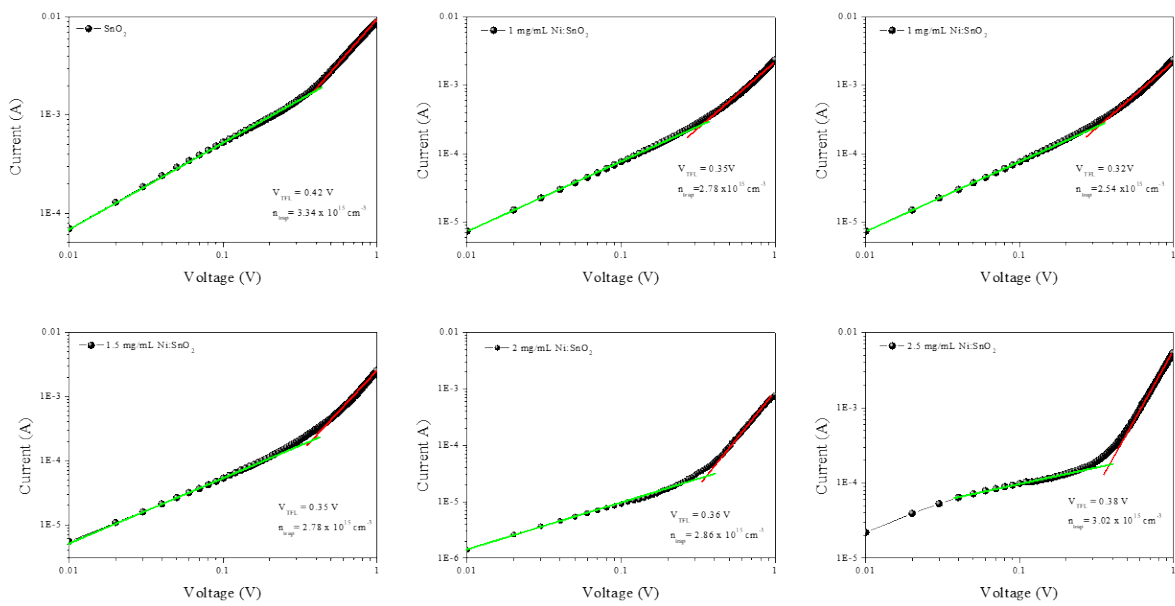

Figure S6. Dark  $I$ - $V$  curves of the electron-only devices with different ETL.

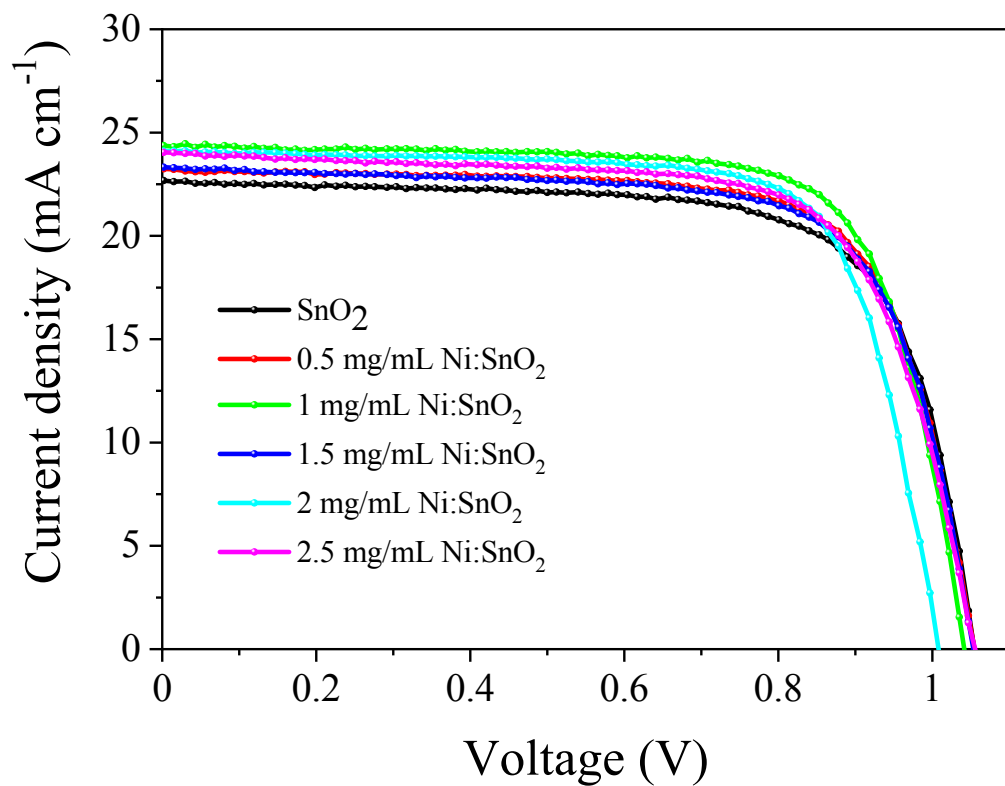

Figure S7. *J-V* curves of the PSCs with different ETLs substrates.



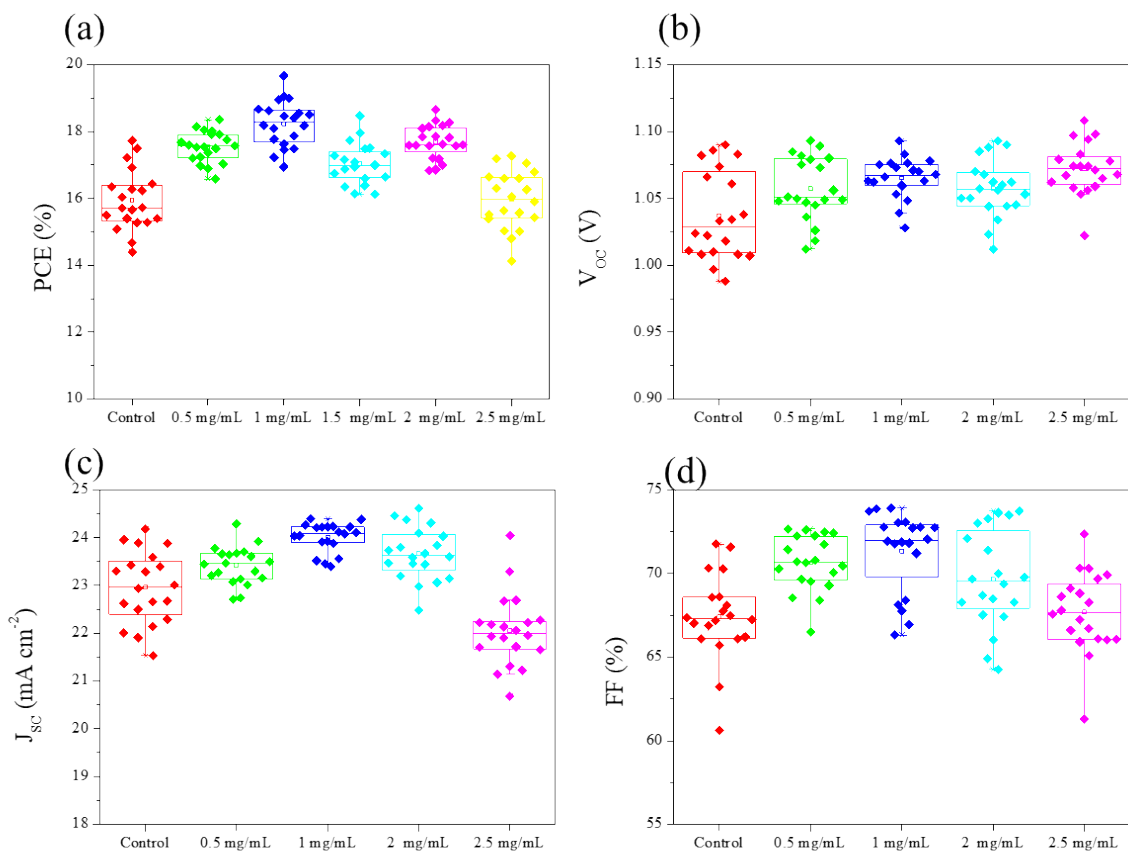

**Figure S8.** Effects of variation of Ni<sup>+</sup> content on photovoltaic parameters including (a) PCE, (b)  $V_{oc}$ , (c)  $J_{sc}$ , and (d) FF.

**Table S1.** Photovoltaic parameters of the best performance devices based on the Ni:SnO<sub>2</sub> ETL with different Ni<sup>+</sup> contents.

|                               | V <sub>oc</sub><br>(V) | J <sub>sc</sub><br>(mA cm <sup>-2</sup> ) | FF    | PCE<br>(%) | R <sub>s</sub><br>(Ω·cm <sup>2</sup> ) | R <sub>sh</sub><br>(kΩ·cm <sup>2</sup> ) |
|-------------------------------|------------------------|-------------------------------------------|-------|------------|----------------------------------------|------------------------------------------|
| Control                       | 1.090                  | 22.67                                     | 71.75 | 17.72      | 126.64                                 | 22529                                    |
| 0.5 mg/mL Ni:SnO <sub>2</sub> | 1.089                  | 23.26                                     | 72.42 | 18.35      | 126.59                                 | 28803                                    |
| 1 mg/mL Ni:SnO <sub>2</sub>   | 1.093                  | 24.39                                     | 73.73 | 19.6       | 108.83                                 | 34398                                    |
| 2 mg/mL Ni:SnO <sub>2</sub>   | 1.062                  | 23.43                                     | 73.63 | 18.32      | 100.09                                 | 26229                                    |
| 2.5 mg/mL Ni:SnO <sub>2</sub> | 1.108                  | 22.69                                     | 72.35 | 18.12      | 18.11                                  | 19004                                    |

**Table S2.** The parameters of PSCs on pristine SnO<sub>2</sub> and Ni:SnO<sub>2</sub> ETLs.

| SnO <sub>2</sub> | V <sub>oc</sub><br>(V) | J <sub>sc</sub><br>(mA cm <sup>-2</sup> ) | FF    | PCE<br>(%) | R <sub>s</sub><br>(Ω·cm <sup>2</sup> ) | R <sub>sh</sub><br>(kΩ·cm <sup>2</sup> ) |
|------------------|------------------------|-------------------------------------------|-------|------------|----------------------------------------|------------------------------------------|
| 1                | 1.018                  | 23.284                                    | 68.62 | 16.27      | 14831                                  | 128.10                                   |
| 2                | 1.01                   | 23.431                                    | 67.77 | 16.03      | 13870                                  | 134.94                                   |

|    |       |        |       |       |       |        |
|----|-------|--------|-------|-------|-------|--------|
| 3  | 1.033 | 23.393 | 67.18 | 16.23 | 14182 | 136.60 |
| 4  | 1.022 | 22.136 | 67.48 | 15.27 | 13499 | 127.28 |
| 5  | 1.034 | 22.651 | 66.87 | 15.65 | 15712 | 146.13 |
| 6  | 0.988 | 23.587 | 66.10 | 15.40 | 10428 | 136.64 |
| 7  | 1.008 | 22.944 | 66.09 | 15.28 | 10235 | 135.41 |
| 8  | 0.997 | 23.887 | 68.57 | 16.34 | 11319 | 119.59 |
| 9  | 1.008 | 23.881 | 70.28 | 16.92 | 13934 | 111.72 |
| 10 | 1.038 | 23.957 | 60.61 | 15.08 | 11073 | 206.64 |
| 11 | 1.007 | 24.18  | 63.24 | 14.39 | 10444 | 169.48 |
| 12 | 1.024 | 23.298 | 65.69 | 14.67 | 11547 | 152.23 |
| 13 | 1.011 | 23.008 | 66.20 | 15.40 | 8155  | 127.56 |
| 14 | 1.074 | 21.528 | 67.02 | 15.49 | 13628 | 146.03 |

|                            |                                     |                                                      |              |                          |                                                   |                                                     |
|----------------------------|-------------------------------------|------------------------------------------------------|--------------|--------------------------|---------------------------------------------------|-----------------------------------------------------|
| 15                         | 1.09                                | 22.671                                               | 71.75        | 17.73                    | 22529                                             | 126.64                                              |
| 16                         | 1.086                               | 22.497                                               | 71.58        | 17.49                    | 22904                                             | 123.35                                              |
| 17                         | 1.083                               | 22.618                                               | 70.31        | 17.22                    | 23366                                             | 123.63                                              |
| 18                         | 1.082                               | 22.294                                               | 68.10        | 16.43                    | 12195                                             | 118.08                                              |
| 19                         | 1.066                               | 21.911                                               | 67.25        | 15.70                    | 13619                                             | 144.01                                              |
| 20                         | 1.061                               | 22.01                                                | 67.35        | 15.72                    | 14432                                             | 145.76                                              |
| Mean                       | <b>1.037</b>                        | <b>22.9583</b>                                       | <b>67.40</b> | <b>15.94</b>             | <b>14095</b>                                      | <b>137.99</b>                                       |
| <b>Ni: SnO<sub>2</sub></b> | <b>V<sub>oc</sub></b><br><b>(V)</b> | <b>J<sub>sc</sub></b><br><b>(mA cm<sup>-2</sup>)</b> | <b>FF</b>    | <b>PCE</b><br><b>(%)</b> | <b>R<sub>s</sub></b><br><b>(Ω·cm<sup>2</sup>)</b> | <b>R<sub>sh</sub></b><br><b>(kΩ·cm<sup>2</sup>)</b> |
| 1                          | 1.06                                | 24.23                                                | 71.88        | 18.5                     | 17343                                             | 106.14                                              |
| 2                          | 1.073                               | 24.23                                                | 73.05        | 19.0                     | 20888                                             | 113.00                                              |
| 3                          | 1.076                               | 24.24                                                | 73.04        | 19.0                     | 20869                                             | 109.03                                              |

|    |       |       |       |      |       |        |
|----|-------|-------|-------|------|-------|--------|
| 4  | 1.076 | 24.21 | 72.72 | 18.9 | 17589 | 109.69 |
| 5  | 1.071 | 24.12 | 71.78 | 18.5 | 16497 | 114.90 |
| 6  | 1.066 | 24.40 | 67.75 | 17.6 | 14814 | 151.29 |
| 7  | 1.059 | 24.08 | 68.40 | 17.5 | 10812 | 116.34 |
| 8  | 1.07  | 24.27 | 66.32 | 17.2 | 8507  | 130.15 |
| 9  | 1.028 | 23.40 | 73.91 | 17.8 | 23172 | 106.17 |
| 10 | 1.083 | 23.92 | 71.83 | 18.6 | 31150 | 132.18 |
| 11 | 1.075 | 23.91 | 71.94 | 18.5 | 24940 | 122.15 |
| 12 | 1.063 | 23.89 | 71.21 | 18.1 | 18817 | 124.28 |
| 13 | 1.062 | 24.22 | 66.94 | 17.2 | 15006 | 150.73 |
| 14 | 1.078 | 23.45 | 72.78 | 18.4 | 25289 | 120.95 |
| 15 | 1.063 | 23.52 | 72.77 | 18.2 | 36216 | 126.60 |

|      |              |              |              |              |              |               |
|------|--------------|--------------|--------------|--------------|--------------|---------------|
| 16   | 1.053        | 23.56        | 72.04        | 17.9         | 23882        | 131.58        |
| 17   | 1.068        | 24.04        | 68.12        | 17.5         | 25302        | 172.27        |
| 18   | 1.048        | 24.11        | 73.87        | 18.7         | 27977        | 110.90        |
| 19   | 1.039        | 24.03        | 72.76        | 18.2         | 28958        | 117.52        |
| 20   | 1.093        | 24.38        | 73.74        | 19.7         | 34399        | 108.83        |
| Mean | <b>1.065</b> | <b>24.01</b> | <b>71.34</b> | <b>18.25</b> | <b>22121</b> | <b>123.73</b> |
